# THE JOURNAL OF NEUROPSYCHIATRY and Clinical Neurosciences

The Official Journal of the American Neuropsychiatric Association

## In this issue:

- Prevention of Post-Stroke Generalized Anxiety Disorder, Using Escitalopram or Problem-Solving Therapy
- Pharmacological Management of Persistent Hostility and Aggression in Persons With Schizophrenia Spectrum Disorders: A Systematic Review
- Behavioral Health Symptoms Associated With Chronic Traumatic Encephalopathy: A Critical Review of the Literature and Recommendations for Treatment and Research
- The Science of Neuropsychiatry: Past, Present, and Future
- Conventional SPECT Versus 3D Thresholded SPECT Imaging in the Diagnosis of ADHD: A Retrospective Study

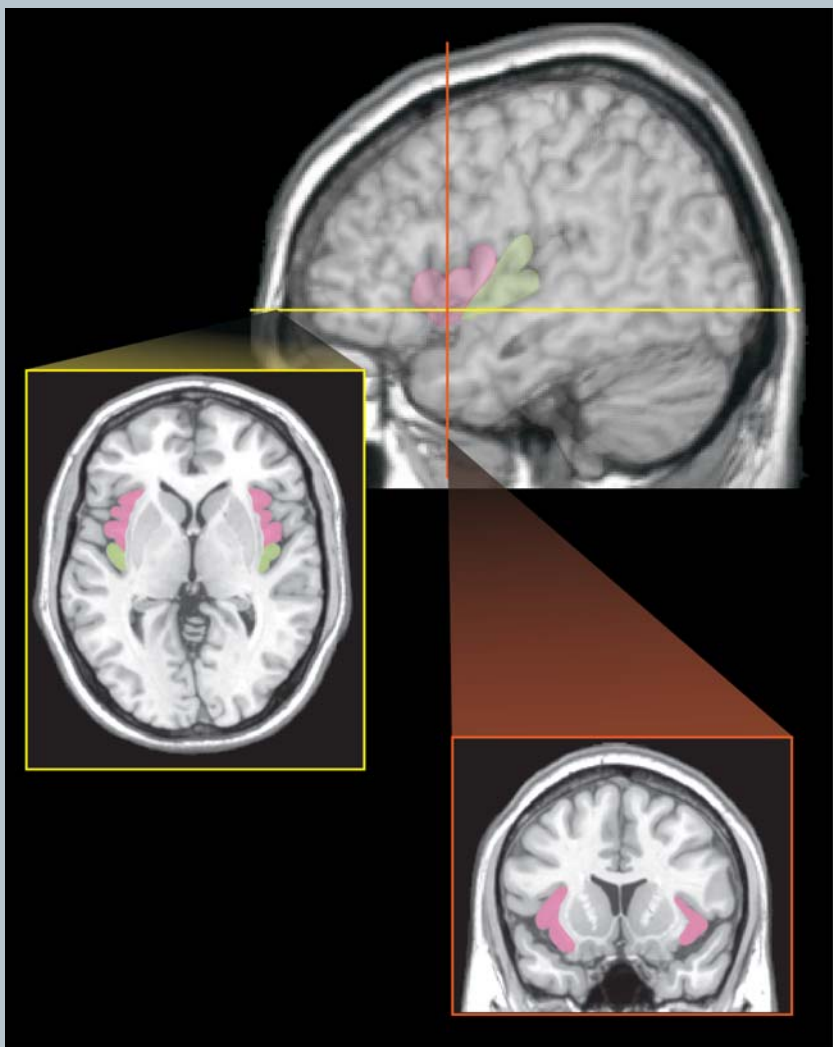

Source: https://neuro.psychiatryonline.org/doi/suppl/10.1176/jnp.2014.26.issue-4/suppl_file/cover.pdf
