# THE JOURNAL OF NEUROPSYCHIATRY and Clinical Neurosciences

The Official Journal of the American Neuropsychiatric Association

**Stuart C. Yudofsky, M.D.**  
*Editor*

**David B. Arciniegas, M.D.**  
**Robert E. Hales, M.D., M.B.A.**  
*Deputy Editors*

**T. Angelita Garcia, M.B.A.**  
*Assistant to the Editors*

#### Consulting Editors

Floyd Bloom, M.D.  
Edward G. Jones, M.D., Ph.D.  
Eric R. Kandel, M.D.  
Henry Nasrallah, M.D.  
Solomon H. Snyder, M.D.

#### Associate Editors

Nancy C. Andreasen, M.D., Ph.D.  
Nashaat N. Boutros, M.D.  
C. Edward Coffey, M.D.  
Joseph T. Coyle, M.D.  
Jeffrey L. Cummings, M.D.  
Michael Ebert, M.D.  
Dwight L. Evans, M.D.  
Robert C. Green, M.D.  
Edward C. Lauterbach, M.D.  
Thomas W. McAllister, M.D.  
John M. Morihisa, M.D.

Charles Nemeroff, M.D., Ph.D.  
Thomas C. Neylan, M.D.  
Trevor R. P. Price, M.D.  
Robert G. Robinson, M.D.  
Stephen Salloway, M.D., M.S.  
Randolph B. Schiffer, M.D.  
Jonathan M. Silver, M.D.  
Robert Stern, Ph.D.  
Paula T. Trzepacz, M.D.  
Daniel R. Weinberger, M.D.

#### Neuropsychiatric Practice and Opinion Editor

Fred Ovsiew, M.D.

#### Neuropsychiatry Classics Editor

Thomas C. Neylan, M.D.

#### Book Review Editor

Paula T. Trzepacz, M.D.

#### Windows to the Brain Editors

Robin A. Hurley, M.D.  
L. Anne Hayman, M.D.  
Katherine H. Taber, Ph.D.

#### Research and Statistical Design Consultants

Douglas Mossman, M.D.  
Eugene Somoza, M.D., Ph.D.

#### American Psychiatric Publishing

Rebecca D. Rinehart  
*Publisher*

Michael Roy  
*Editorial Director, Journals*

Angela Moore  
*Editorial Manager*

Wendy Lieberman Taylor  
*Production Manager*

Y. Nicole Gray  
*Editorial Support Services Manager*

Patrick Hansard  
*Director of Marketing and Sales*

Christopher Keene  
*Sales Manager*  
(703) 907-8538

Roger Domras  
*Director of Fulfillment and Circulation*

*The Journal of Neuropsychiatry and Clinical Neurosciences*, (ISSN 0895-0172), is published quarterly by the American Psychiatric Association (APA), 1000 Wilson Blvd., Suite 1825, Arlington, VA 22209. Copyright © 2014 American Psychiatric Association. *The Journal of Neuropsychiatry and Clinical Neurosciences* is protected by copyright and may not be reproduced in any manner without written permission. *The Journal of Neuropsychiatry and Clinical Neurosciences* is abstracted/indexed in *Chemical Abstracts*, *Current Contents/Clinical Medicine*<sup>®</sup>, *EMBASE/Excerpta Medica*, *Index Medicus/MEDLINE/MEDLARS*, *PsycINFO*, *Psychological Abstracts*, *Research Alert*<sup>®</sup>, and *Sci Search*<sup>®</sup>. It is available through University Microfilms, Inc., 300 North Zeeb Road, Ann Arbor, MI 48106, in microform, electronic, or paper format.

Manuscript submissions should no longer be sent by mail. Please visit <http://mc.manuscriptcentral.com> to upload a paper online.

U.S. subscriptions are \$229 per year (4 issues) individual; \$183 for APA members; international subscriptions are \$345 per year. APA Members receive 20% discount off regular individual subscription rate. Institutional Subscriptions are tier priced. For institutional site license information and pricing, please email us at [appi@psych.org](mailto:appi@psych.org), call (800) 368-5777 or visit [www.appi.org/ForLibrarians/](http://www.appi.org/ForLibrarians/). *The Journal of Neuropsychiatry and Clinical Neurosciences*, 1000 Wilson Blvd., Suite 1825, Arlington, VA 22209.

Advertising inquiries may be directed to Tim Wolfinger at PMI, 30 East 33rd St., New York, NY 10016; (212) 904-0379; [twolfinger@pmi.com](mailto:twolfinger@pmi.com).

APA is not responsible for statements made in this publication by contributors or advertisers. Unless stated, material in *The Journal of Neuropsychiatry and Clinical Neurosciences* does not reflect the endorsement, official attitude, or position of APA or the American Neuropsychiatric Association.

Periodicals postage paid at Arlington, VA, and additional mailing offices. POSTMASTER: Send address changes to *The Journal of Neuropsychiatry and Clinical Neurosciences*, 1000 Wilson Blvd., Suite 1825, Arlington, VA 22209.

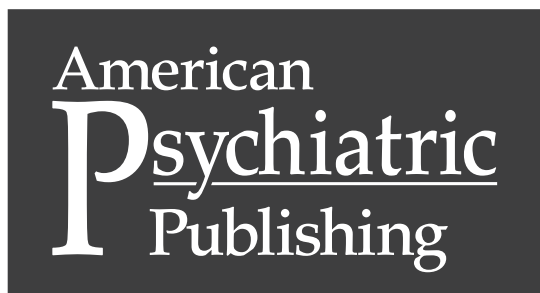

A Division of American Psychiatric Association

Please visit the Journal's web site at <http://neuro.psychiatryonline.org>
